# Supplementary material for: Efficient PbS Quantum Dot Solar Cells with Both Mg-Doped ZnO Window Layer and ZnO Nanocrystal Interface Passivation Layer
Source: MDPI journal article supplement (doi:10.3390/nano11010219), 2021-01-15
Supplement: s1 [file s1]

# Efficient PbS Quantum Dot Solar Cells with Both Mg-Doped ZnO Window Layer and ZnO Nanocrystal Interface Passivation Layer

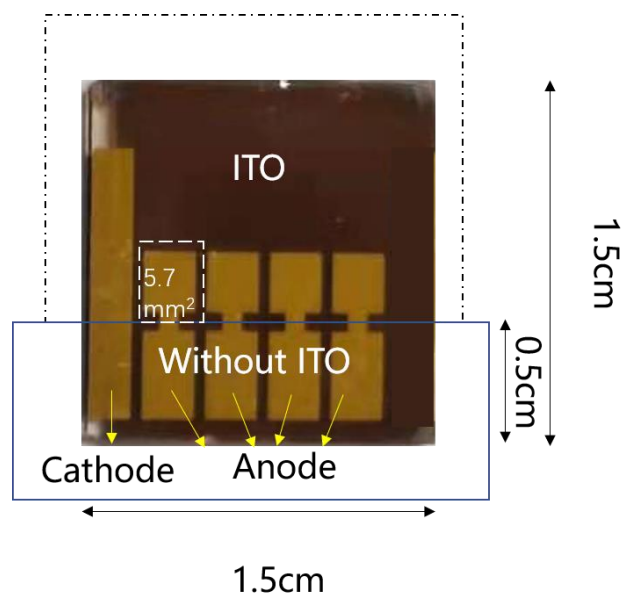

**Figure S1.** The photo of a real PbS CQDs solar cells, in the part of cathode, the MZO/ZnO NC/PbS active layer has been scraped away before Au deposition. The active area is 0.057 cm<sup>2</sup> for each device.

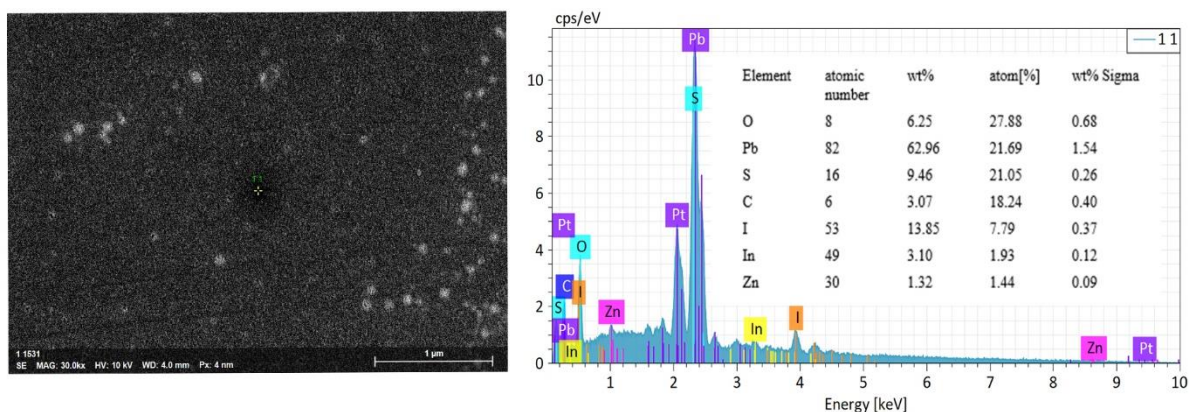

**Figure S2.** SEM image and Energy dispersive X-ray Spectroscopy of ITO/MZO/ZnO-NC/PbS CQDs.

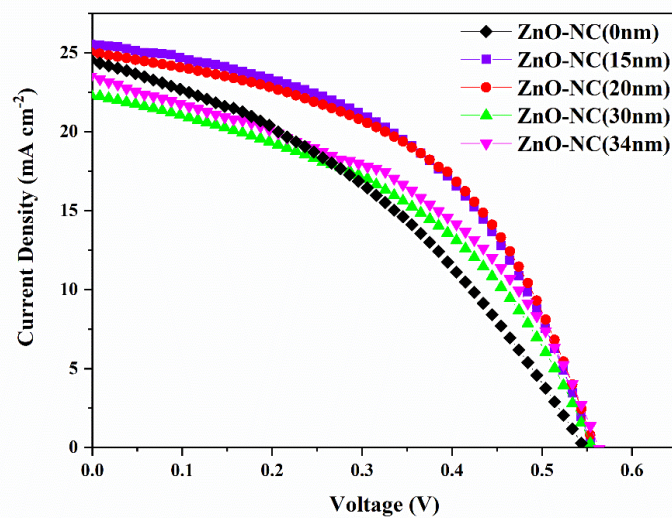

**Figure S3.**  $J$ - $V$  curves for PbS QDs solar cells with different ZnO-NC layer thickness.

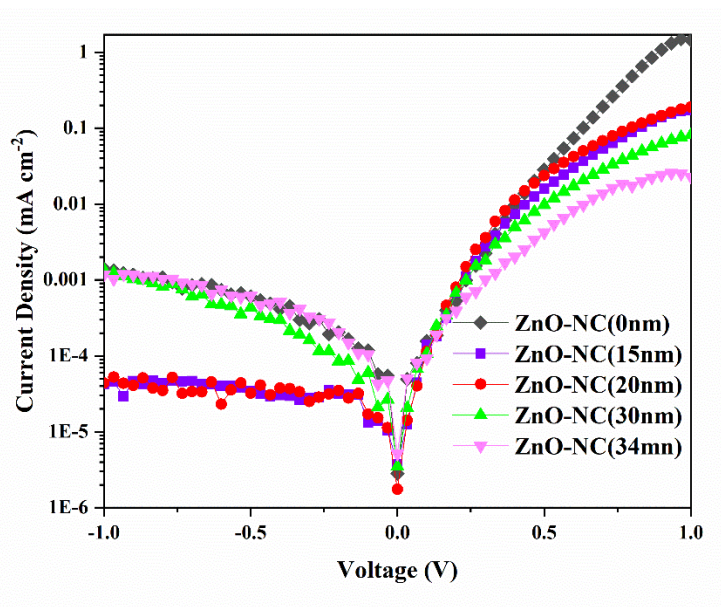

**Figure S4.** dark  $J$ - $V$  curves for PbS QDs solar cells with different ZnO-NC layer thickness.
